# Supplementary material
Source: HighWire-hosted journal article supplement (https://bmjopen.bmj.com/content/10/4/e034736)
Supplement: inline-supplementary-material-1 [file inline-supplementary-material-1.pdf]

| Supplementary File 1: Demographic and reproductive characteristics of adolescent postabortion care patients (15-19) and nonadolescent (20-49) postabortion care patients, Zimbabwe 2016 |       |            |       |            |
|-----------------------------------------------------------------------------------------------------------------------------------------------------------------------------------------|-------|------------|-------|------------|
| Characteristics of respondents                                                                                                                                                          | 15-19 |            | 20-49 |            |
|                                                                                                                                                                                         | %     | Weighted N | %     | Weighted N |
| <b>Marital Status</b>                                                                                                                                                                   |       |            |       |            |
| In union                                                                                                                                                                                | 67%   | 103        | 82%   | 921        |
| Not in union                                                                                                                                                                            | 33%   | 52         | 18%   | 205        |
| <b>Residence</b>                                                                                                                                                                        |       |            |       |            |
| Urban                                                                                                                                                                                   | 42%   | 65         | 63%   | 715        |
| Rural                                                                                                                                                                                   | 58%   | 90         | 37%   | 427        |
| <b>Education</b>                                                                                                                                                                        |       |            |       |            |
| No education                                                                                                                                                                            | 1%    | 2          | 1%    | 7          |
| Some/completed primary                                                                                                                                                                  | 20%   | 30         | 13%   | 153        |
| Some/completed secondary                                                                                                                                                                | 79%   | 122        | 71%   | 804        |
| Greater than secondary                                                                                                                                                                  | 1%    | 1          | 15%   | 175        |
| <b>Religion</b>                                                                                                                                                                         |       |            |       |            |
| Apostolic                                                                                                                                                                               | 51%   | 79         | 69%   | 785        |
| Protestant/Pentecostal/Other                                                                                                                                                            | 49%   | 76         | 31%   | 353        |
| <b>Previous Pregnancy</b>                                                                                                                                                               |       |            |       |            |
| 0                                                                                                                                                                                       | 76%   | 118        | 14%   | 156        |
| 1+                                                                                                                                                                                      | 24%   | 37         | 86%   | 984        |
| <b>Pregnancy intention</b>                                                                                                                                                              |       |            |       |            |
| Unintended                                                                                                                                                                              | 31%   | 48         | 29%   | 329        |
| Intended                                                                                                                                                                                | 67%   | 105        | 70%   | 795        |
| Don't Know                                                                                                                                                                              | 1%    | 2          | 1%    | 11         |
| <b>Using contraception at time of current pregnancy</b>                                                                                                                                 |       |            |       |            |
| No                                                                                                                                                                                      | 87%   | 132        | 53%   | 591        |
| Yes                                                                                                                                                                                     | 13%   | 19         | 47%   | 524        |
| <b>Gestation presented with complications</b>                                                                                                                                           |       |            |       |            |
| First trimester                                                                                                                                                                         | 58%   | 90         | 66%   | 747        |
| Second trimester                                                                                                                                                                        | 42%   | 65         | 34%   | 379        |
| <b>Severity of complication</b>                                                                                                                                                         |       |            |       |            |
| Mild                                                                                                                                                                                    | 55%   | 84         | 60%   | 673        |
| Moderate                                                                                                                                                                                | 23%   | 34         | 19%   | 211        |
| Severe/Near-Miss                                                                                                                                                                        | 22%   | 34         | 21%   | 239        |
| <b>Received postabortion modern contraception</b>                                                                                                                                       |       |            |       |            |
| No                                                                                                                                                                                      | 56%   | 81         | 55%   | 566        |
| Yes                                                                                                                                                                                     | 44%   | 64         | 45%   | 470        |
| <b>Total</b>                                                                                                                                                                            | 12%   | 155        | 88%   | 1141       |
